# Supplementary material for: Novel 1,3,5-Triazinyl Aminobenzenesulfonamides Incorporating Aminoalcohol, Aminochalcone and Aminostilbene Structural Motifs as Potent Anti-VRE Agents, and Carbonic Anhydrases I, II, VII, IX, and XII Inhibitors
Source: MDPI journal article supplement (doi:10.3390/ijms23010231), 2021-12-26
Supplement: s1 [file s1]

## Supplementary information

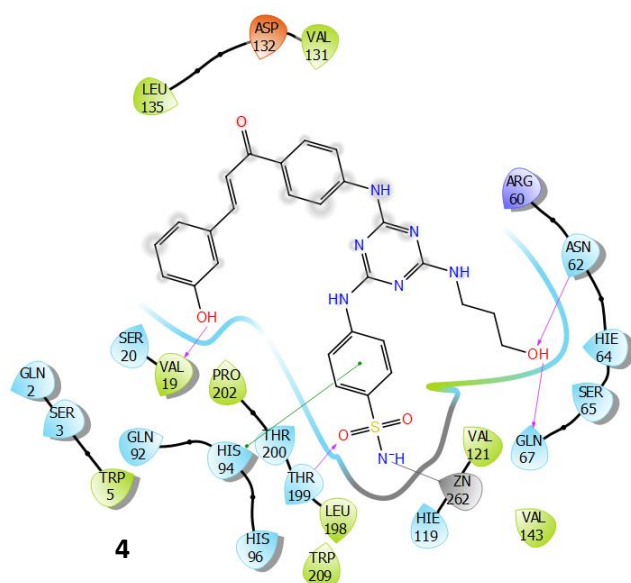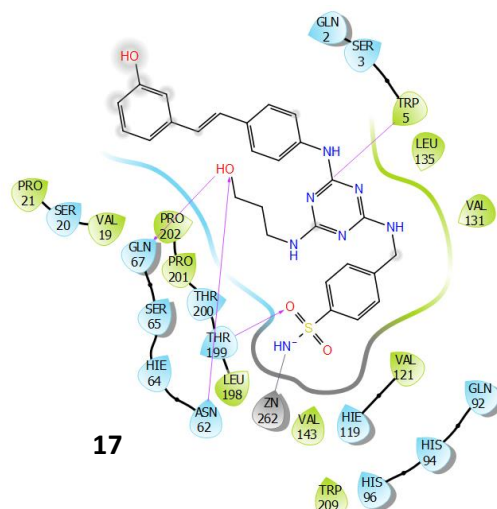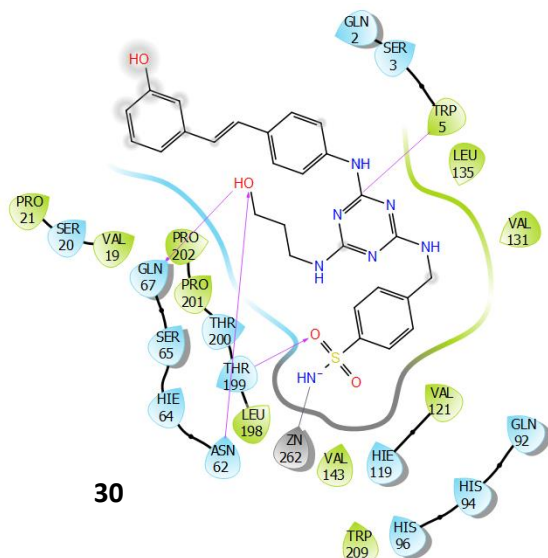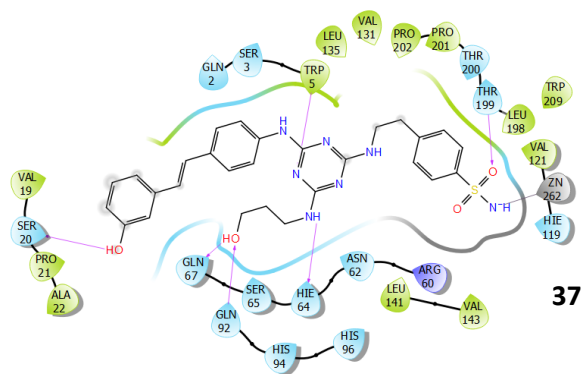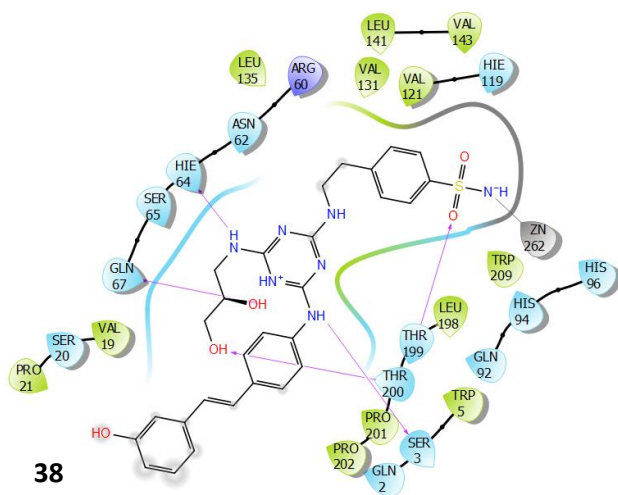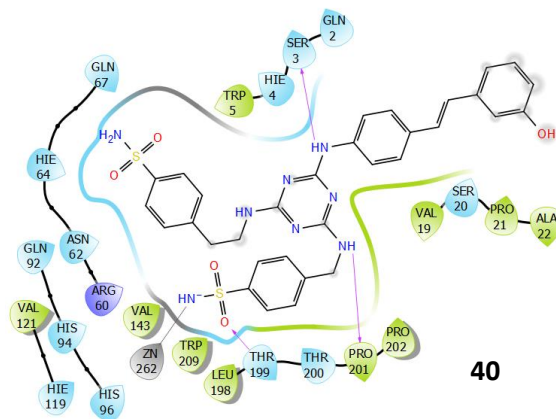

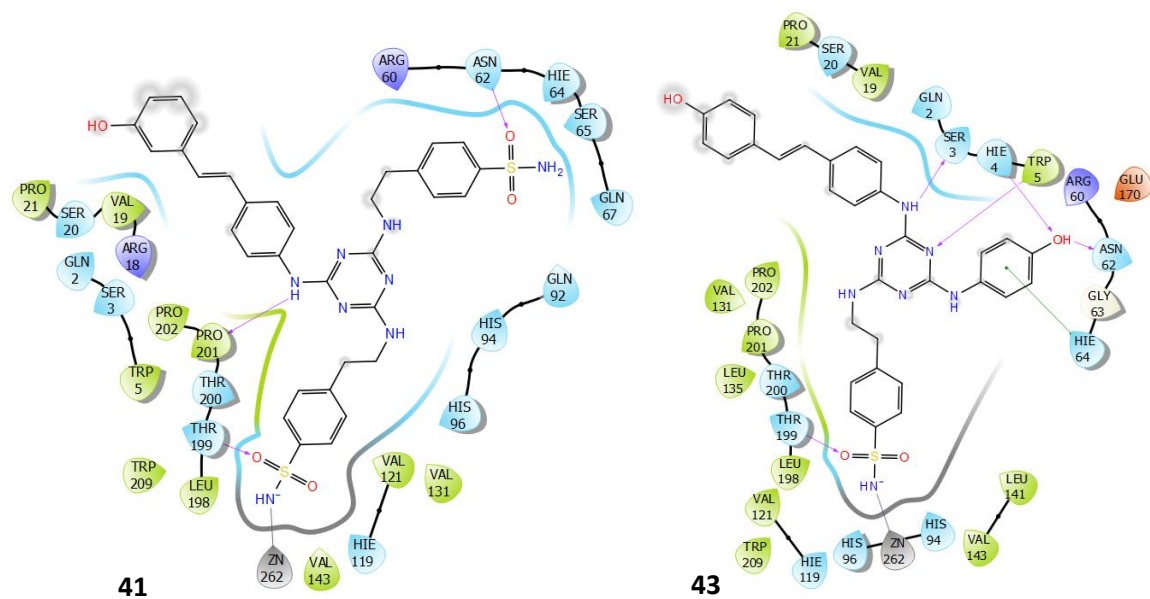

**Suppl. Inf. Figure 1.** 2D interaction diagrams of ligands docked in hCA IX.

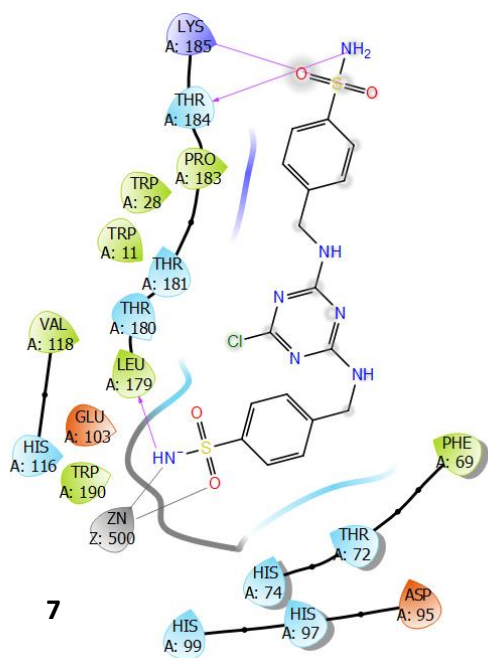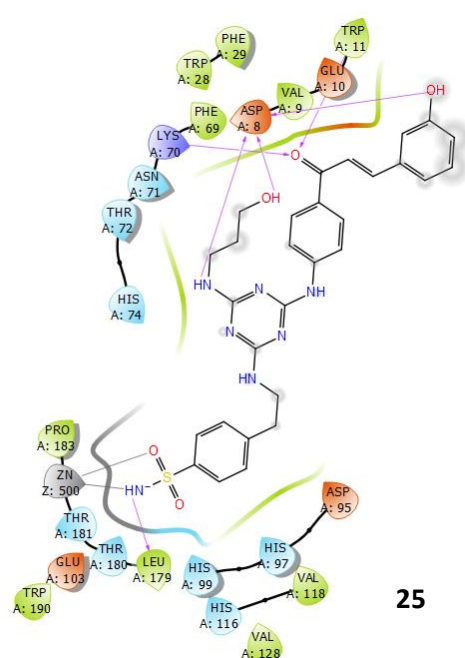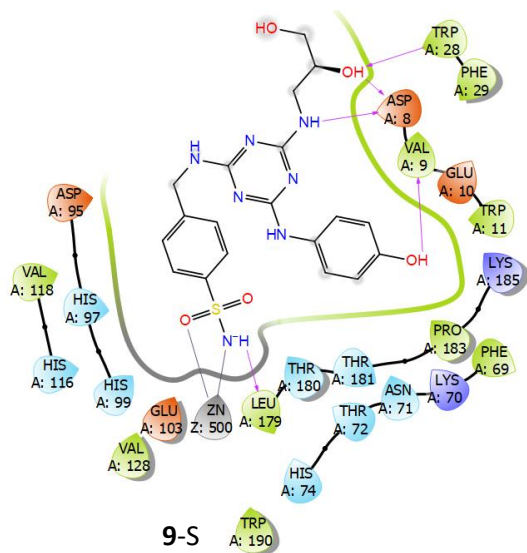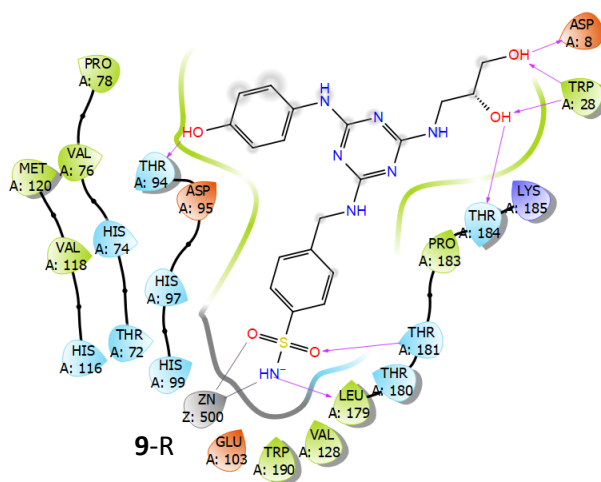



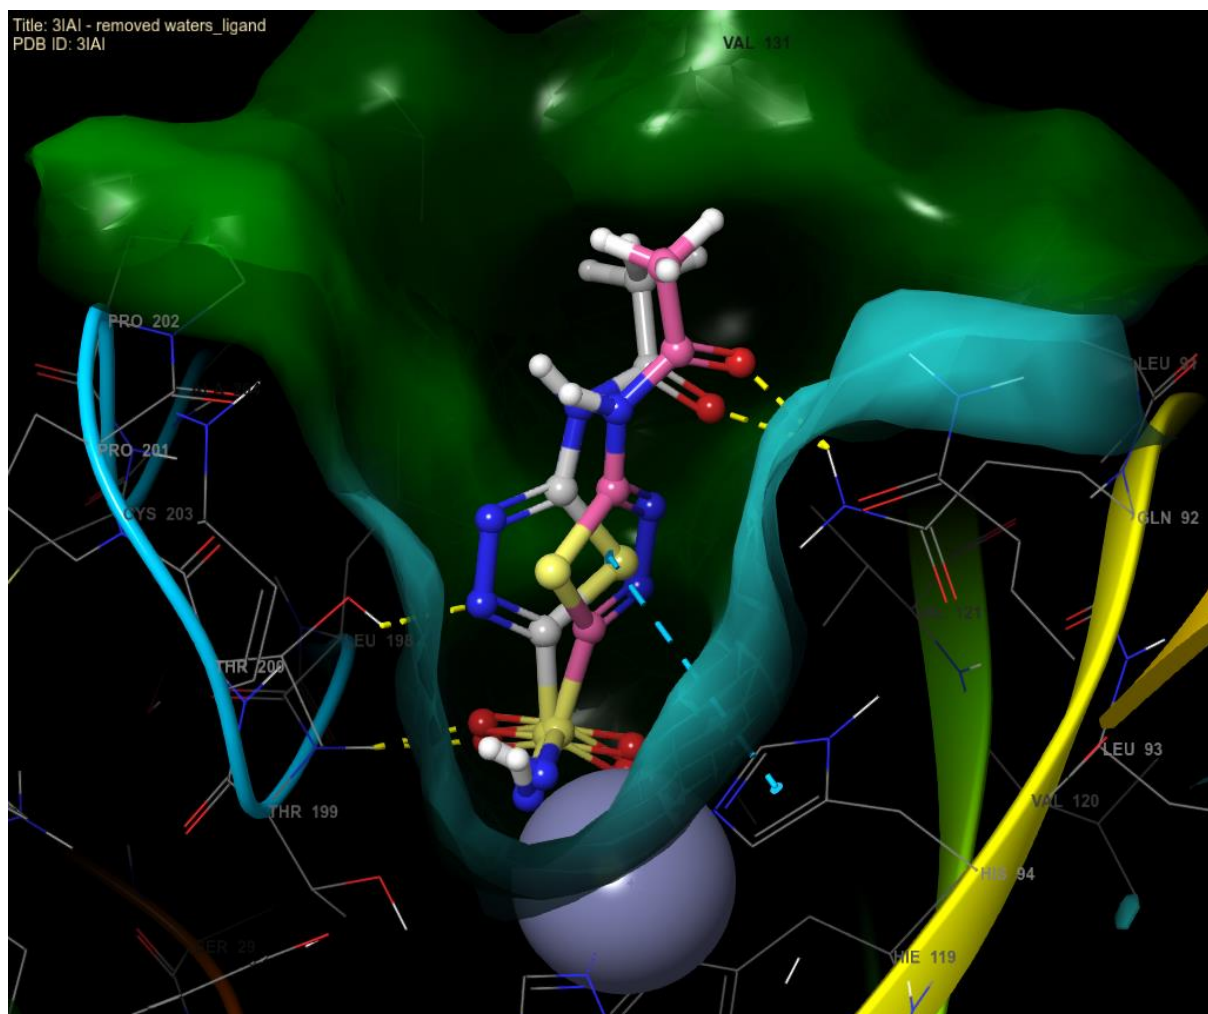

**Suppl. Inf. Figure 3.** Superposition of acetazolamide co-crystallized with hCA IX (the molecule with light gray carbons) and pose of acetazolamide docked in hCA IX (the molecule with pink carbons). RMSD = 1.57 Å<sup>2</sup>

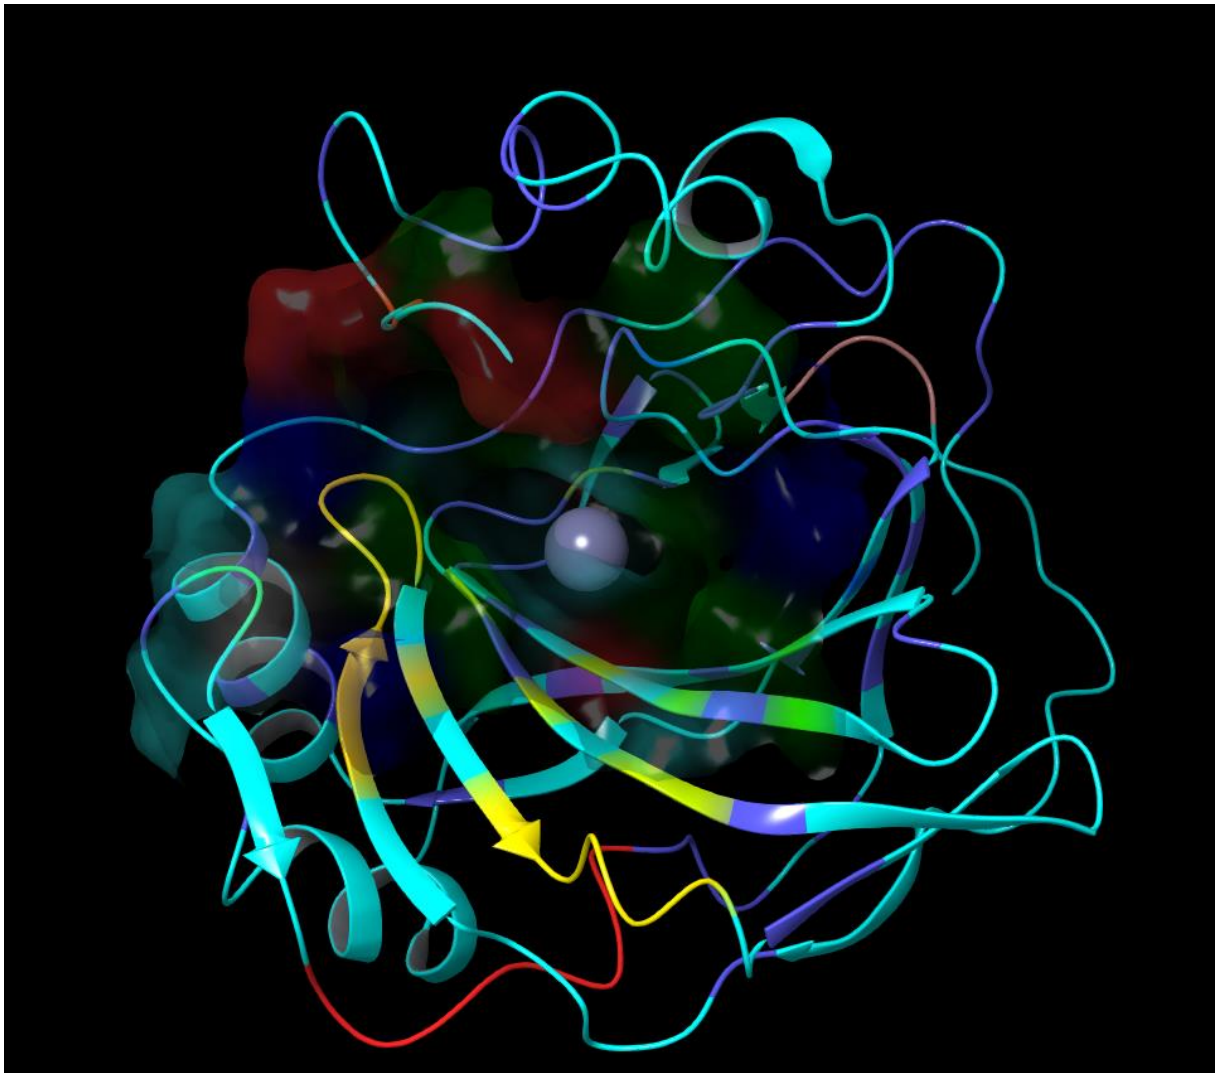

**Suppl. Inf. Figure 4.** 3D representation of enterococcal carbonic anhydrase created by homology modeling. Protein is depicted by ribbon and surface area of binding site with zinc dication at the bottom.
